## TITLE PAGE

**Title:** A quasi-experimental cohort study evaluating a conditional economic incentive on first-dose COVID-19 vaccination rates among older adults in South Africa

**Subtitle:** Evaluation of the Vooma Voucher program among adults 60 years and older

### Authors full name and highest academic degree:

Candice M Chetty-Makkan, PhD<sup>1</sup>; Harsha Thirumurthy, PhD<sup>2</sup>; Elizabeth F Bair, MS<sup>2</sup>; Simamkele Bokolo, MSocSci<sup>1</sup>; Candy Day, MMedSci<sup>3</sup>; Korstiaan Wapenaar, MComm<sup>4</sup>, Jesse Werner, FCPHM<sup>4</sup>; Lawrence Long, PhD<sup>1, 5</sup>; Brendan Maughan-Brown, PhD<sup>6</sup>; Jacqui Miot<sup>1</sup>, PhD; Sophie J S Pascoe, PhD<sup>1</sup>; Alison M Buttenheim, PhD, MBA<sup>7</sup>

### Affiliations:

<sup>1</sup> Health Economics and Epidemiology Research Office, Faculty of Health Sciences, University of Witwatersrand, Johannesburg, South Africa

<sup>2</sup> Department of Medical Ethics and Health Policy, Perelman School of Medicine, University of Pennsylvania, Philadelphia, PA, USA

<sup>3</sup> DG Murray Trust, Cape Town, South Africa

<sup>4</sup> Genesis Analytics, Johannesburg, South Africa

<sup>5</sup> Department of Global Health, Boston University School of Public Health, Boston, MA, USA.

<sup>6</sup> University of Cape Town, Southern Africa Labour and Development Research Unit, South Africa

<sup>7</sup> Department of Family and Community Health, School of Nursing, University of Pennsylvania, Philadelphia PA, USA.

**Corresponding author:** Candice M Chetty-Makkan; [cchetty@heroza.org](mailto:cchetty@heroza.org)

**Manuscript Word Count:** 1200

**Key points (75-100 words or less)**

**Question:** What is the association of the Vooma Voucher program with COVID-19 vaccination among older adults in South Africa?

**Findings:** In this cohort study, a US\$7 (ZAR100) incentive for adults aged  $\geq 60$  years was associated with a of 7.15-12.01% increase in daily first-dose vaccination in November 2021 compared to late October 2021. The incentive accounted for 6,476-10,874 additional first vaccine doses November 1-27, 2021, or 8.31-13.95% of all doses administered to those aged  $\geq 60$  years during that period.

**Meaning:** Small guaranteed financial incentives may be an effective strategy to increase vaccine demand among older adults in low- and middle-income countries.

**Word count: 100**

## **Abstract (no more than 350 words)**

**Importance:** COVID-19 vaccination coverage in South Africa remains low despite increased access to vaccines. On November 1, 2021, South Africa introduced the Vooma Voucher program, which provided a small guaranteed financial incentive, a Vooma Voucher redeemable at grocery stores, for COVID-19 vaccination among older adults, a population most vulnerable to serious illness, hospitalization, and death. However, the association of financial incentives with vaccination coverage remains unclear.

**Objective:** To evaluate the association of the conditional economic incentive program with first-dose vaccination rates among older adults (aged  $\geq 60$  years) in South Africa.

**Design:** A quasi-experimental cohort study using daily data on first doses administered. We ran interrupted time series (ITS) models to evaluate the Vooma Voucher program, launched on November 1, 2021, at national and provincial levels. We used data between October 1, 2021 and November 27, 2021 in models estimated at the daily level.

**Setting and participants:** The Vooma Voucher program was a nationwide vaccination incentive program implemented for adults aged  $\geq 60$  years from November 1, 2021 to February 28, 2022.

**Intervention:** Individuals who received their first vaccine dose received a text message to access a ~\$7 (ZAR100) voucher that was redeemable at nationwide chain of grocery stores.

**Main outcome:** Daily first COVID-19 vaccine doses administered per 10,000 individuals aged  $\geq 60$  years.

**Results:** The Vooma Voucher program was associated with a 7.15-12.01% increase in daily first-dose vaccination in November 2021 compared to late October 2021. The incentive accounted for 6,476-10,874 additional first vaccine doses from November 1-27, 2021, or 8.31-13.95% of all doses administered to those aged  $\geq 60$  years during that period. This result is robust

to the inclusion of controls for the number of active vaccine delivery sites and for the nationwide Vooma weekend initiative (November 12-14), both of which also increased vaccinations through expanded access to vaccines and demand creation activities.

**Conclusions/Relevance:** Financial incentives for COVID-19 vaccination led to a modest increase in first dose vaccinations among older adults in South Africa. In addition to financial incentives, expanded access to vaccines may also results in higher vaccination coverage.

**Word count: 340**

**Trial registration number (SANCTR):** DOH-27-012022-9116

## Introduction

As COVID-19 vaccines became available in 2021, many countries faced substantial demand constraints sooner than expected and struggled to achieve vaccination targets. In South Africa, COVID-19 vaccines were widely available for individuals aged  $\geq 60$  years by May 2021 (1,2). Despite robust efforts to promote vaccines and ensure easy access, by October 2021 63% of older adults received at least one vaccine dose, well below the South African National Department of Health (NDoH) goals to protect vulnerable populations (2).

As in other countries, there was substantial interest for financial incentives to increase vaccine uptake. Evidence on the effectiveness of incentives for COVID-19 vaccination comes almost exclusively from high-income countries and is mixed: some studies found that guaranteed rewards can increase vaccination (3,4), while others showed no effect of guaranteed or lottery incentives (5–7), or indicated that incentives may backfire by decreasing vaccination intentions (8). Low- and middle-income countries (LMICs), have faced a substantial burden of COVID-19, but there is lack of evidence on whether incentives for COVID-19 are effective in LMICs.

To increase vaccination among older adults in advance of an anticipated COVID-19 fourth wave, the NDoH Vooma Voucher program was launched on November 1, 2021 to reach the vulnerable and impoverished. The voucher program was promoted through multiple communication channels (eFigures) and continued until February 28, 2022, with some changes in eligibility and voucher amounts (eMethods). We assessed the short-term association of the Vooma Voucher incentive program on first-dose vaccination rates among those aged  $\geq 60$  years.

## Methods

We used national data on the number of first doses of the COVID-19 vaccine that were administered daily. The analysis was based on data provided by the NDoH for purposes of evaluating the incentive programme. Using population data from the South African Community Survey 2016 (9) we calculated the number of first COVID-19 vaccine doses administered daily per 10,000 individuals aged  $\geq 60$  years. A sensitivity analysis with weekly doses is in the eMethods. First dose vaccination rates were calculated separately at the national- and province-level. The Vooma Voucher program was introduced on November 1, 2021, as a nationwide incentive for COVID-19 vaccination among adults aged  $\geq 60$  years. Individuals who received their first vaccine dose received a US\$7 (ZAR 100) voucher by text message that was redeemable at local grocery stores.

We estimated four separate interrupted time series (ITS) models to estimate the association between the Vooma Voucher programs and trends in vaccination rates: unadjusted and adjusted national models as well as unadjusted and adjusted provincial models. The primary outcome was the daily vaccination rate per 10,000 individuals. National models utilized linear regression with Newey-West standard errors, while provincial models utilized generalized estimating equations with robust standard errors. Daily models included day of the week indicators to control for temporal patterns within each week and week-specific fixed effects. Unadjusted models included no additional covariates; adjusted models included additional measures of vaccine supply (daily active vaccine delivery sites per 100,000 individuals and an indicator variable for the three days of the Vooma weekend). The Vooma weekend was a nationwide initiative to open more vaccination sites to boost demand (10). Province-level adjusted models included an indicator for KwaZulu-Natal and Gauteng provinces, as well as an interaction term to assess impact of the voucher program in these provinces versus the rest of the country. Our analysis included data

from October 1, 2021 to November 27, 2021. Although the Vooma Voucher program continued until February 28, 2022, the announcement of the Omicron variant on November 24, 2022 would likely confound the effect of the incentive program on days that followed the announcement. Analyses were conducted using Stata 17.0 (StataCorp, College Station, TX). This study was approved by the University of Witwatersrand Human Research Ethics Committee (Medical) (211123).

## Results

In the weeks preceding introduction of the Vooma Voucher program, the 7-day rolling average of daily first vaccine doses administered declined from 13-15 doses per 10,000 individuals aged  $\geq 60$  years in early-September to  $<10$  doses by late-October 2021 (**Figure 1**). For the first 27 days, the Vooma Voucher program was associated with an increase in daily first vaccine doses administered of 0.89 per 10,000 individuals (95% CI 0.52, 1.27;  $p < 0.001$ ) (**Table 1**); that equated to 10,874 additional doses compared to the number of first doses expected to be administered in the absence of the Vooma Voucher program. Adjusting for vaccine delivery sites and for the Vooma weekend reduced the increase associated with the Vooma Voucher program (+0.65 daily first doses per 10,000 individuals; 95% CI 0.33, 0.96;  $p < 0.001$ , 7,942 additional doses). Provincial models showed directionally similar results (unadjusted: +0.78 daily first doses per 10,000 individuals; 95% CI 0.42, 1.15;  $p < 0.001$ , 9,530 additional doses; adjusted: +0.53 daily first doses per 10,000 individuals; 95% CI 0.16, 0.89;  $p = 0.004$ , 6,476 additional doses), **Table 1**. Taken together, these results suggest that 8.31-13.95% of the 77,947 first doses administered to individuals aged  $\geq 60$  years between November 1-27, 2021, may be attributed to the Vooma Voucher program (**Figure 2**). Using the last week of October 2021 as a baseline, the percentage increase in vaccinations is estimated at 7.15%- to 12.01% per 10,000 individuals per

day. Weekly models and implications of supply and demand creation adjustments are found in the eTable.

## Discussion

A nationwide incentive program that provided vouchers redeemable at grocery stores to older adults who received a first dose of a COVID-19 vaccine was associated with increased vaccinations in South Africa. In the first month of the program, before vaccine demand may have been influenced by the announcement of the Omicron variant, 7.15% to 12.01% of all first vaccine doses administered to older adults could be attributed to the program. This represents a meaningful increase in vaccinations in response to a US\$7 (ZAR100) incentive.

This study is among the first to evaluate incentives for COVID-19 vaccination in LMICs. Evaluations of such incentives have primarily been conducted in high-income countries (3–7). An incentive of US\$24 increased vaccination rates by 4% in a randomized trial in Sweden (3). Moreover, several studies found that lotteries and guaranteed incentives offered by US states did not increase vaccination rates (7). The Vooma Voucher may have had better results due to substantial advertisement of the program and amount of the incentive relative to average income levels in South Africa. It is notable that focused Vooma weekends were associated with higher vaccination rates.

A key limitation is the assumption in our ITS models there were no other factors that coincided with the introduction of the Vooma Voucher program and affected vaccine demand. The robustness of our findings to the inclusion of supply and demand creation measures, and to provincial and weekly specifications, increases confidence in our findings. Another limitation is



that we only study short-term effects of the incentive program, as the announcement of the Omicron variant made it challenging to study effects of incentives beyond that date.

Given the vulnerability of older adults to serious illness, hospitalization, and death as a result of COVID-19, identifying effective strategies to increase vaccine demand is crucial. More generally, as LMICs struggle to achieve sufficiently high vaccine demand despite expansions in vaccine delivery and access, our findings suggest that small financial incentives may be effective in increasing vaccination coverage.

#### **Author Contributions:**

**Chetty-Makkan, Thirumurthy, Bair, Bokolo, Day, Wapenaar, Werner & Buttenheim** had full access to all the data in the study and take responsibility for the integrity of the data and the accuracy of the data analysis.

**Concept and design:** Chetty-Makkan, Thirumurthy, Bair, Bokolo & Buttenheim

**Drafting of the manuscript:** Chetty-Makkan, Thirumurthy, Bair, Bokolo & Buttenheim

**Critical revision of the manuscript for important intellectual content:** Thirumurthy, Long, Maughan-Brown, Miot, Pascoe, Buttenheim

**Statistical analysis:** Thirumurthy, Bair and Buttenheim

**Obtained funding:** Chetty-Makkan, Maughan-Brown, Pascoe, Miot & Buttenheim

**Administrative, technical, or material support:** Chetty-Makkan, Bair, Bokolo, Day, Wapenaar, Werner, Buttenheim

**Supervision:** Thirumurthy & Buttenheim

#### **Conflict of Interest Disclosures:**

This analysis was funded by the Bill and Melinda Gates Foundation (INV 036204).

Jacqui Miot is a member of the National Ministerial Advisory Committee on COVID-19 in South Africa.

All other authors have declared no conflict of interest.

**Acknowledgments:** We would like to thank Dr Zameer Brey, from the Bill and Melinda Gates Foundation, and Mr Gaurang Tanna, formerly from the National Department of Health, for their technical support and guidance in this study. We would also like to thank the National Department of Health COVID-19 Vaccination Management Team for access to data.

## Figures and Tables

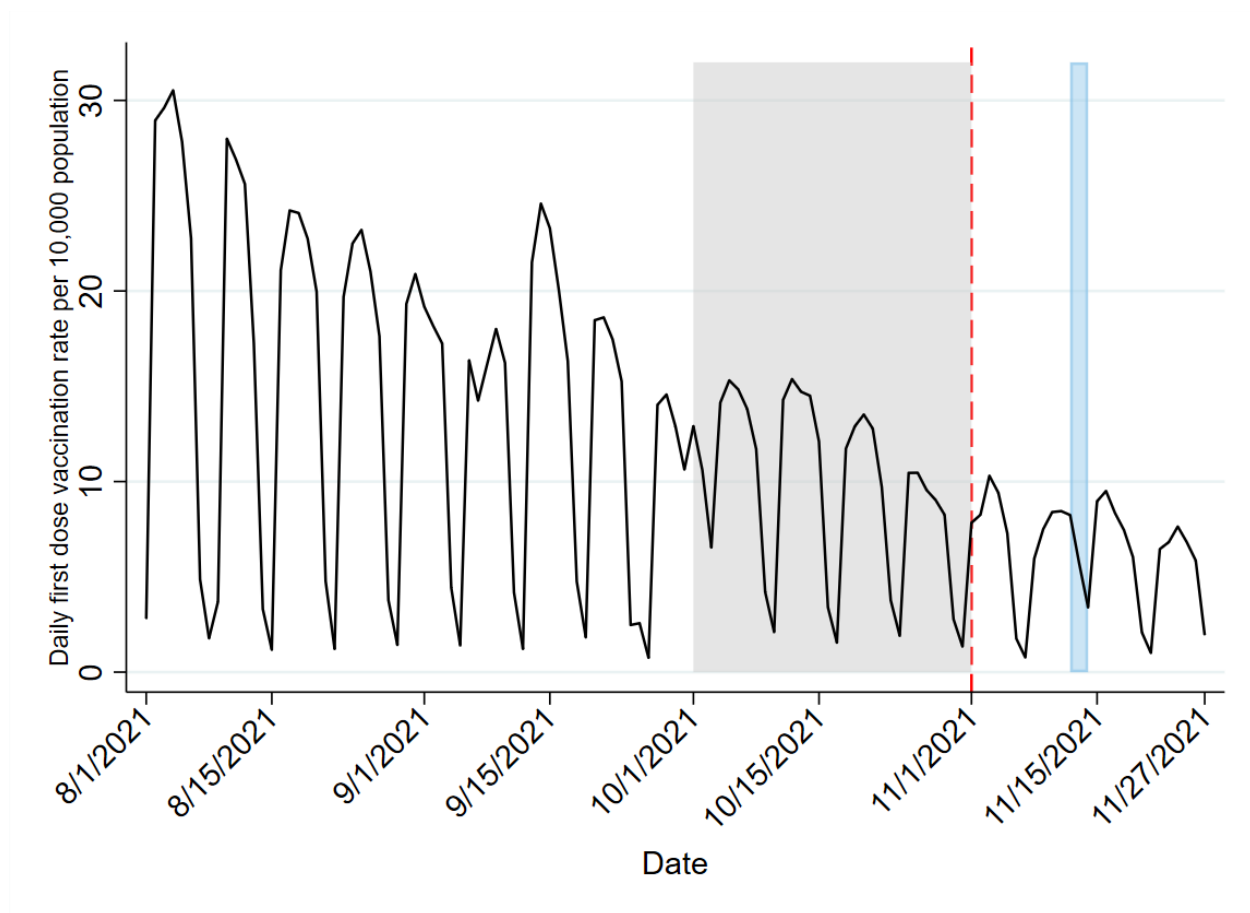

**Figure 1.** Daily first dose vaccinations per 10,000 adults aged  $\geq 60$  years in South Africa, August 1, 2021-November 27, 2021, with launch of the Vooma Voucher program shown on November 1, 2021

**Notes:** The pre-intervention period is marked by the grey box. The Vooma weekend. November 12-14, 2021, is marked by the light blue box

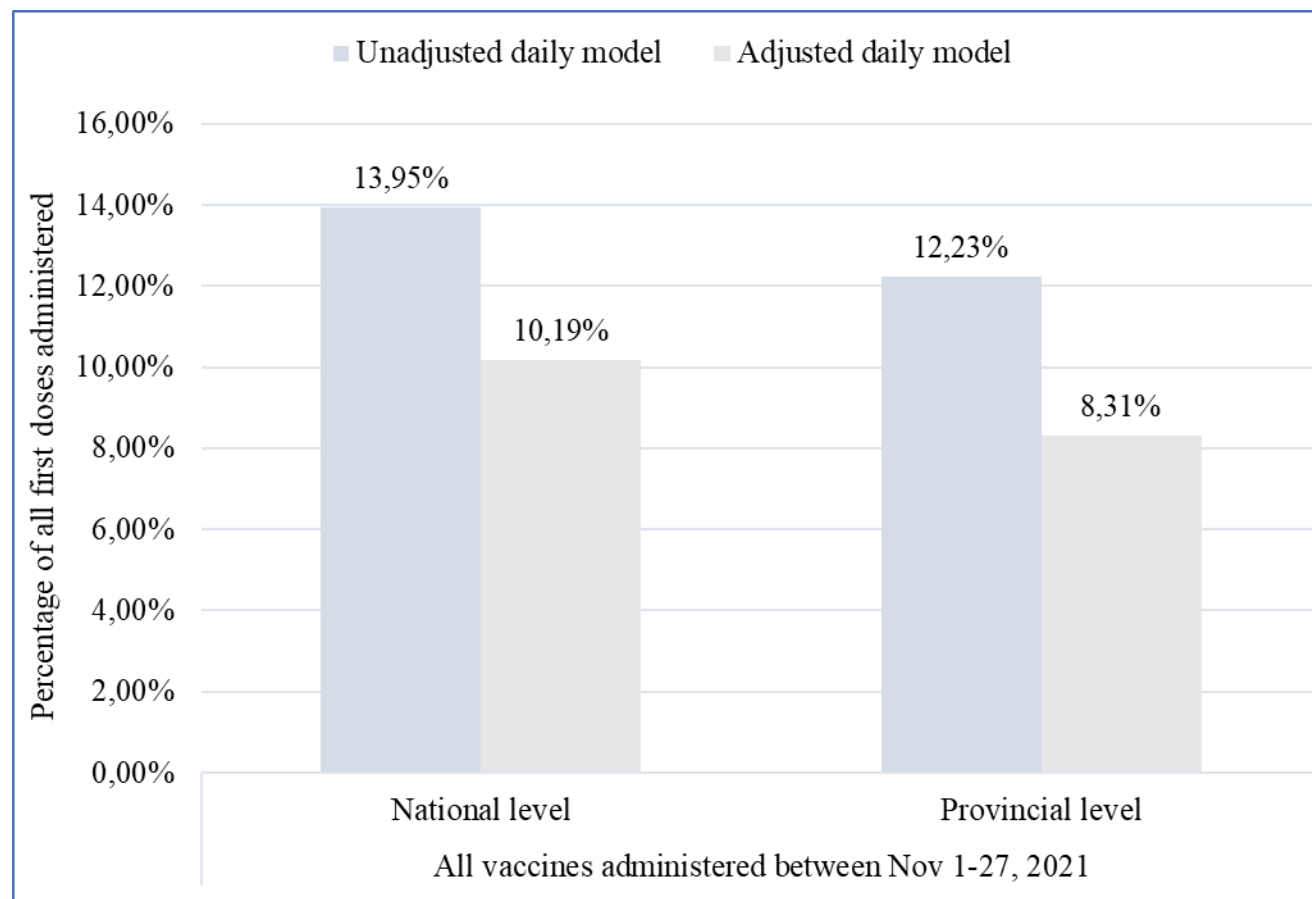

**Figure 2:** Percentage of all 77, 947 first doses administered to individuals aged  $\geq 60$  years between November 1 – November 27, 2021.

**Table 1:** Results from interrupted time-series analyses estimating the association of the Vooma voucher program with changes in the number of first vaccine doses delivered per day per 10,000 adults  $\geq 60$  years in South Africa.

|                                                 | Unadjusted daily models |         | Adjusted daily models  |         |
|-------------------------------------------------|-------------------------|---------|------------------------|---------|
|                                                 | Coeff<br>(95% CI)       | p-value | Coeff<br>(95% CI)      | p-value |
| <b>National</b>                                 |                         |         |                        |         |
| Vooma voucher program                           | 0.89<br>(0.52, 1.27)    | p<0.001 | 0.65<br>(0.33, 0.96)   | p<0.001 |
| Vooma weekend                                   | --                      | --      | 3.28<br>(1.98, 4.58)   | p<0.001 |
| Daily active facilities per 100, 000 population | --                      | --      | 0.55<br>(-0.60, 1.69)  | p=0.340 |
| <b>Provincial</b>                               |                         |         |                        |         |
| Vooma voucher program                           | 0.78<br>(0.42, 1.15)    | p<0.001 | 0.53<br>(0.16, 0.89)   | p=0.004 |
| Vooma weekend                                   | --                      | --      | 2.16<br>(1.09, 3.23)   | p<0.004 |
| Daily active facilities per 100, 000 population | --                      | --      | 0.87<br>(0.44, 1.31)   | p<0.001 |
| KwaZulu-Natal and Gauteng                       | -2.35<br>(-5.13, 0.43)  | p=0.097 | -1.56<br>(-4.44, 1.32) | p=0.288 |
| Voucher in KwaZulu Natal and Gauteng            | 0.76<br>(-0.49, 2.00)   | p=0.234 | 0.23<br>(-0.80, 1.27)  | p=0.659 |

**Notes:** Models also included day of the week and week fixed effects. In province-level models, we include an indicator for KwaZulu-Natal and Gauteng combined, compared to the rest of the country.

## References

1. Karim AA, Dyk J van. Here's how phase 2 of SA's COVID vaccine roll-out works. Bhekisisa Centre for Health Journalism [Internet]. 2021 May 17; Available from: <https://bhekisisa.org/health-news-south-africa/2021-05-17-phase-2-of-sas-covid-vaccine-roll-out-starts-today-heres-how-it-works/>
2. Health D of. Department of Health COVID-19 Online Resources and News Portal [Internet]. 2022 [cited 2022 Feb 9]. Available from: <https://sacoronavirus.co.za/>
3. Campos-Mercade P, Meier AN, Schneider FH, Meier S, Pope D, Wengström E. Monetary incentives increase COVID-19 vaccinations. *Science* (80- ). 2021;374(6569):879–82.
4. Wong CA, Pilkington W, Doherty IA, Zhu Z, Gawande H, Kumar D, et al. Guaranteed Financial Incentives for COVID-19 Vaccination: A Pilot Program in North Carolina. *JAMA Intern Med*. 2022;182(1):78–80.
5. Walkey AJ, Law A, Bosch NA. Lottery-Based Incentive in Ohio and COVID-19 Vaccination Rates. *JAMA - J Am Med Assoc*. 2021;326(8):766–7.
6. Chang T, Jacobson M, Shah M, Pramanik R, Shah S. Financial Incentives and Other Nudges Do Not Increase COVID-19 Vaccinations among the Vaccine Hesitant. *Nber Work Pap Ser* [Internet]. 2021; Available from: <http://www.nber.org/papers/w29403.pdf>
7. Thirumurthy H, Milkman KL, Volpp K, Buttenheim A, Pope DG. Association Between Statewide Financial Incentive Programs and COVID-19 Vaccination Rates. *PLoS One* [Internet]. 2022;17(3):1–7. Available from: <http://dx.doi.org/10.1371/journal.pone.0263425>

8. Paul Hsieh. Perks and Incentives for COVID-19 Vaccination may backfire. Forbes [Internet]. 2021 May 28; Available from:  
<https://www.forbes.com/sites/paulhsieh/2021/05/28/perks-and-incentives-for-covid-19-vaccination-may-backfire/?sh=6c09c82226b1>
9. Minnesota Population Center. Integrated Public Use Microdata Series, International: Version 7.3 Community Survey 2016. Minneapolis, MN: IPUMS,; 2020.
10. Health D of. Tweet - Vooma Weekend [Internet]. Twitter; 2021. Available from:  
[https://twitter.com/HealthZA/status/1459209233623363597?ref\\_src=twsrc%5Etfw](https://twitter.com/HealthZA/status/1459209233623363597?ref_src=twsrc%5Etfw)
